# Supplementary material for: The Development, Validation, and Application of a UHPLC-HESI-MS Method for the Determination of 17 Cannabinoids in Cannabis sativa L. var. sativa Plant Material
Source: MDPI journal article supplement (doi:10.3390/molecules28248008), 2023-12-08
Supplement: s1 [file s1]

|                        |        |        |     |   |        |     |    |        |     |    |
|------------------------|--------|--------|-----|---|--------|-----|----|--------|-----|----|
| Intra-day              | 0.008  | 0.008  | 100 | 1 | 0.008  | 100 | 4  | 0.008  | 100 | 4  |
|                        | 0.128  | 0.127  | 99  | 2 | 0.124  | 97  | 8  | 0.122  | 95  | 7  |
|                        | 1.024  | 1.022  | 99  | 2 | 1.020  | 99  | 8  | 1.018  | 99  | 8  |
| Inter-day              | 0.008  | 0.008  | 100 | 3 | 0.008  | 100 | 1  | 0.008  | 100 | 2  |
|                        | 0.128  | 0.127  | 99  | 2 | 0.120  | 94  | 6  | 0.118  | 92  | 8  |
|                        | 1.024  | 1.022  | 99  | 4 | 1.018  | 99  | 2  | 1.017  | 99  | 3  |
| CBDA                   |        |        |     |   |        |     |    |        |     |    |
| Intra-day              | 0.400  | 0.390  | 98  | 4 | 0.370  | 96  | 8  | 0.415  | 101 | 3  |
|                        | 6.400  | 6.380  | 99  | 2 | 6.380  | 101 | 1  | 6.420  | 101 | 2  |
|                        | 51.200 | 51.180 | 99  | 3 | 51.150 | 99  | 4  | 51.115 | 101 | 5  |
| Inter-day              | 0.400  | 0.370  | 96  | 6 | 0.360  | 95  | 5  | 0.390  | 99  | 2  |
|                        | 6.400  | 6.370  | 99  | 4 | 6.340  | 99  | 3  | 6.390  | 99  | 3  |
|                        | 51.200 | 51.150 | 99  | 2 | 51.100 | 98  | 4  | 51.190 | 99  | 3  |
| CBNA                   |        |        |     |   |        |     |    |        |     |    |
| Intra-day              | 0.002  | 0.002  | 100 | 2 | 0.002  | 100 | 2  | 0.002  | 100 | 3  |
|                        | 0.032  | 0.032  | 100 | 2 | 0.30   | 94  | 6  | 0.30   | 94  | 8  |
|                        | 0.256  | 0.256  | 100 | 1 | 0.250  | 98  | 4  | 0.249  | 97  | 3  |
| Inter-day              | 0.002  | 0.002  | 100 | 3 | 0.002  | 100 | 2  | 0.002  | 100 | 2  |
|                        | 0.032  | 0.031  | 97  | 7 | 0.029  | 96  | 4  | 0.028  | 93  | 7  |
|                        | 0.256  | 0.253  | 98  | 5 | 0.0248 | 96  | 8  | 0.245  | 95  | 6  |
| CBGA                   |        |        |     |   |        |     |    |        |     |    |
| Intra-day              | 0.020  | 0.020  | 100 | 2 | 0.020  | 100 | 2  | 0.022  | 100 | 3  |
|                        | 0.320  | 0.320  | 100 | 3 | 0.323  | 101 | 1  | 0.330  | 103 | 2  |
|                        | 2.560  | 2.560  | 100 | 3 | 2.450  | 96  | 4  | 2.560  | 100 | 2  |
| Inter-day              | 0.020  | 0.020  | 100 | 4 | 0.019  | 95  | 7  | 0.018  | 90  | 10 |
|                        | 0.320  | 0.310  | 97  | 6 | 0.300  | 94  | 6  | 0.315  | 98  | 5  |
|                        | 2.560  | 2.540  | 99  | 4 | 2.400  | 94  | 5  | 2.500  | 98  | 7  |
| Δ <sup>9</sup> -THCA-A |        |        |     |   |        |     |    |        |     |    |
| Intra-day              | 0.080  | 0.080  | 100 | 1 | 0.078  | 98  | 3  | 0.076  | 96  | 5  |
|                        | 1.280  | 1.260  | 98  | 2 | 1.250  | 97  | 3  | 1.270  | 99  | 4  |
|                        | 10.240 | 10.200 | 99  | 3 | 10.150 | 99  | 3  | 10.210 | 99  | 2  |
| Inter-day              | 0.080  | 0.080  | 100 | 1 | 0.075  | 94  | 8  | 0.073  | 91  | 10 |
|                        | 1.280  | 1.260  | 98  | 2 | 1.230  | 96  | 6  | 1.235  | 96  | 5  |
|                        | 10.240 | 10.190 | 99  | 1 | 10.035 | 98  | 4  | 10.125 | 99  | 2  |
| CBCA                   |        |        |     |   |        |     |    |        |     |    |
| Intra-day              | 0.080  | 0.080  | 100 | 1 | 0.078  | 98  | 4  | 0.079  | 99  | 3  |
|                        | 1.280  | 1.270  | 99  | 2 | 1.260  | 98  | 4  | 1.290  | 101 | 5  |
|                        | 10.240 | 10.220 | 99  | 2 | 10.200 | 99  | 3  | 10.180 | 99  | 2  |
| Inter-day              | 0.080  | 0.080  | 100 | 1 | 0.075  | 94  | 7  | 0.077  | 96  | 4  |
|                        | 1.280  | 1.270  | 99  | 3 | 1.240  | 97  | 5  | 1.250  | 98  | 5  |
|                        | 10.240 | 10.180 | 99  | 3 | 10.175 | 99  | 2  | 10.140 | 99  | 2  |
| CBLA                   |        |        |     |   |        |     |    |        |     |    |
| Intra-day              | 0.020  | 0.020  | 100 | 2 | 0.019  | 95  | 8  | 0.019  | 95  | 5  |
|                        | 0.320  | 0.320  | 100 | 2 | 0.318  | 99  | 3  | 0.316  | 98  | 3  |
|                        | 2.560  | 2.560  | 100 | 2 | 2.550  | 99  | 3  | 2.545  | 99  | 4  |
| Inter-day              | 0.020  | 0.020  | 100 | 3 | 0.018  | 90  | 10 | 0.017  | 85  | 5  |
|                        | 0.320  | 0.320  | 100 | 4 | 0.316  | 98  | 4  | 0.315  | 98  | 6  |
|                        | 2.560  | 2.550  | 99  | 5 | 2.500  | 97  | 5  | 2.458  | 96  | 4  |
| CBDVA                  |        |        |     |   |        |     |    |        |     |    |
| Intra-day              | 0.020  | 0.020  | 100 | 2 | 0.020  | 100 | 2  | 0.020  | 100 | 2  |
|                        | 0.320  | 0.320  | 100 | 1 | 0.316  | 98  | 4  | 0.320  | 100 | 4  |
|                        | 2.560  | 2.560  | 100 | 3 | 2.560  | 100 | 2  | 2.560  | 100 | 1  |
| Inter-day              | 0.020  | 0.020  | 100 | 1 | 0.018  | 90  | 10 | 0.018  | 90  | 8  |
|                        | 0.320  | 0.310  | 97  | 5 | 0.310  | 96  | 8  | 0.311  | 97  | 5  |
|                        | 2.560  | 2.540  | 99  | 6 | 2.457  | 96  | 4  | 2.320  | 91  | 4  |
| Δ <sup>9</sup> -THCVA  |        |        |     |   |        |     |    |        |     |    |
| Intra-day              | 0.020  | 0.020  | 100 | 1 | 0.018  | 90  | 7  | 0.018  | 90  | 8  |
|                        | 0.320  | 0.320  | 100 | 2 | 0.316  | 98  | 4  | 0.318  | 99  | 4  |
|                        | 2.560  | 2.560  | 100 | 1 | 2.456  | 96  | 2  | 2.564  | 101 | 2  |
| Inter-day              | 0.020  | 0.020  | 100 | 2 | 0.016  | 80  | 8  | 0.016  | 80  | 8  |
|                        | 0.320  | 0.320  | 100 | 1 | 0.312  | 97  | 5  | 0.299  | 93  | 7  |
|                        | 2.560  | 2.550  | 99  | 4 | 2.412  | 94  | 4  | 2.218  | 87  | 6  |

<sup>1</sup>Method and <sup>2</sup>precision recovery values (expressed as % RSD) obtained by enriching each matrix (inflorescences, leaves, CRM) at three different levels for each compound. Recovery was determined based on the equation: % R = [(C<sub>f</sub>-C<sub>u</sub>)\*100]/C<sub>a</sub>, where C<sub>a</sub> is the calculated (not analyzed) concentration of analyte added to the test sample; C<sub>f</sub> is the concentration of fortified samples; C<sub>u</sub> is the concentration for unfortified samples.

**Table S2.** Results obtained, average values and z-score for dried hemp proficiency tests (HFL2301)

| Compound               | Results<br>(mg kg <sup>-1</sup> ) | Average value<br>(mg kg <sup>-1</sup> ) | z-score |
|------------------------|-----------------------------------|-----------------------------------------|---------|
| CBD                    | 26,970                            | 33,216                                  | -1.5    |
| CBDa                   | 33,010                            | 42,680                                  | -1.4    |
| CBG                    | 4,520                             | 4,930                                   | -0.6    |
| CBGA                   | 27,520                            | 43,280                                  | -2.1    |
| Δ <sup>9</sup> -THC    | 2,070                             | 2,120                                   | -0.2    |
| Δ <sup>9</sup> -THCA-A | 550                               | 640                                     | -1.0    |
| Δ <sup>8</sup> -THC    | 1.6                               | 4                                       | -0.5    |
| Δ <sup>9</sup> -THCV   | 40                                | 70                                      | -0.3    |
| Δ <sup>9</sup> -THCVA  | 370                               | -                                       | -       |
| CBDV                   | 730                               | 970                                     | -0.5    |
| CBDVA                  | 2,060                             | 2,170                                   | -0.4    |
| CBN                    | 200                               | 200                                     | -0.1    |
| CBNA                   | 40                                | -                                       | -       |
| CBC                    | 3,610                             | 3,254                                   | 0.8     |
| CBCA                   | 680                               | 3,060                                   | -1.5    |
| CBL                    | 120                               | -                                       | -       |
| CBLA                   | 116                               | -                                       | -       |

**Table S3.** Results obtained, average values and z-score for dried hemp proficiency tests (HFL2305)

| Compound               | Results<br>(mg kg <sup>-1</sup> ) | Average value<br>(mg kg <sup>-1</sup> ) | z-score |
|------------------------|-----------------------------------|-----------------------------------------|---------|
| CBD                    | 1,981                             | 1,861                                   | 0.5     |
| CBDa                   | 4,080                             | 3,480                                   | 1.2     |
| CBG                    | 9,350                             | 10,400                                  | -0.8    |
| CBGA                   | 50,800                            | 77,380                                  | -       |
| Δ <sup>9</sup> -THC    | 720                               | 630                                     | 0.8     |
| Δ <sup>9</sup> -THCA-A | 270                               | 220                                     | 0.4     |
| Δ <sup>8</sup> -THC    | 0                                 | 0                                       | -       |
| Δ <sup>9</sup> -THCV   | 60                                | 90                                      | -0.3    |
| Δ <sup>9</sup> -THCVA  | 80                                | -                                       | -       |
| CBDV                   | 310                               | 280                                     | 0.2     |
| CBDVA                  | 1100                              | 1260                                    | -1.0    |
| CBN                    | 130                               | 110                                     | 0.4     |
| CBNA                   | 1850                              | -                                       | -       |

|             |      |      |      |
|-------------|------|------|------|
| <b>CBC</b>  | 2240 | 2381 | -0.6 |
| <b>CBCA</b> | 1180 | 1370 | -1.0 |
| <b>CBL</b>  | 20   | -    | -    |
| <b>CBLA</b> | 21   | -    | -    |

**Table S4.** The content of 17 cannabinoids for each hemp tea sample [mg kg<sup>-1</sup>].

| Sam<br>ple | CBC                         | CBDV                       | CBG                          | CBL                           | CBN                       | CBNA                       | $\Delta^8$ -<br>THC       | $\Delta^9$ -THC             | $\Delta^9$ -<br>THCV        | CBDVA                        | CBD                             | CBGA                          | $\Delta^9$ -<br>THCVA        | CBLA                        | CBCA                         | $\Delta^9$ -THCA-<br>A         | CBDA                             |
|------------|-----------------------------|----------------------------|------------------------------|-------------------------------|---------------------------|----------------------------|---------------------------|-----------------------------|-----------------------------|------------------------------|---------------------------------|-------------------------------|------------------------------|-----------------------------|------------------------------|--------------------------------|----------------------------------|
| 1          | 262.5 <sup>l</sup> ±16.9    | 35.4 <sup>ijk</sup> ±6.4   | 155.3 <sup>efghi</sup> ±17.8 | 38.0 <sup>a</sup> ±7.9        | 80.0 <sup>n</sup> ±1.0    | 19.7 <sup>hij</sup> ±2.0   | 4.9 <sup>bcdef</sup> ±0.8 | 122.6 <sup>cdef</sup> ±14.0 | 0.9 <sup>abc</sup> ±0.1     | 95.1 <sup>bcd</sup> ±11.8    | 5,299 <sup>lmn</sup> ±21.1      | 240.4 <sup>ab</sup> ±16.3     | 8.8 <sup>bcde</sup> ±1.3     | 40.2 <sup>bcde</sup> ±3.2   | 115.0 <sup>ghijk</sup> ±17.5 | 284.7 <sup>bcde</sup> ±8.1     | 8,877 <sup>ghijkl</sup> ±660     |
| 2          | 196.1 <sup>ghi</sup> ±7.9   | 28.6 <sup>efghi</sup> ±2.8 | 234.8 <sup>k</sup> ±21.3     | 14.8 <sup>ijk</sup> ±1.6      | 30.5 <sup>hij</sup> ±2.8  | 17.3 <sup>fghi</sup> ±2.3  | 7.6 <sup>fg</sup> ±0.2    | 223.7 <sup>jk</sup> ±14.1   | 1.9 <sup>abcdefg</sup> ±0.2 | 80.0 <sup>bcd</sup> ±3.5     | 4,880 <sup>klmn</sup> ±749      | 716.5 <sup>abcde</sup> ±110.6 | 7.9 <sup>abcd</sup> ±1.1     | 65.5 <sup>efghi</sup> ±10.6 | 122.2 <sup>hijk</sup> ±4.6   | 331.6 <sup>cdefgh</sup> ±38.10 | 6,810 <sup>defghijk</sup> ±1,127 |
| 3          | 203.3 <sup>ijk</sup> ±15.8  | 14.0 <sup>bc</sup> ±1.5    | 232.5 <sup>m</sup> ±19.9     | 10.6 <sup>cdefghij</sup> ±1.9 | 13.3 <sup>bcd</sup> ±0.9  | 2.0 <sup>a</sup> ±0.4      | <LOD <sup>a</sup>         | 49.3 <sup>ab</sup> ±4.2     | 0.5 <sup>a</sup> ±0.1       | 12.7 <sup>a</sup> ±1.2       | 1,535 <sup>abcde</sup> ±205     | 3,646 <sup>i</sup> ±671       | 4.5 <sup>a</sup> ±1.4        | 10.0 <sup>a</sup> ±1.1      | 32.5 <sup>ab</sup> ±4.4      | 58.30 <sup>a</sup> ±5.7        | 1,904 <sup>ab</sup> ±292         |
| 4          | 240.0 <sup>kl</sup> ±15.1   | 26.3 <sup>efgh</sup> ±2.9  | 416.5 <sup>k</sup> ±32.5     | 10.3 <sup>bcd</sup> ±0.2      | 10.0 <sup>abc</sup> ±0.2  | 8.0 <sup>bc</sup> ±0.5     | 3.9 <sup>bcd</sup> ±0.1   | 188.7 <sup>hij</sup> ±5.0   | 2.4 <sup>defgh</sup> ±0.1   | 100.0 <sup>defgh</sup> ±4.0  | 2,391 <sup>bcd</sup> ±345       | 1,797 <sup>g</sup> ±283       | 13.3 <sup>ghij</sup> ±1.9    | 70.7 <sup>fghi</sup> ±5.0   | 94.7 <sup>efghi</sup> ±.2    | 374.8 <sup>cdefghi</sup> ±20.3 | 7,534 <sup>defghij</sup> ±269    |
| 5          | 241.3 <sup>kl</sup> ±12.5   | 57.6 <sup>l</sup> ±4.4     | 96.7 <sup>bcdef</sup> ±6.7   | 11.8 <sup>efghij</sup> ±1.0   | 87.3 <sup>a</sup> ±7.9    | 22.0 <sup>jklm</sup> ±1.6  | <LOD <sup>a</sup>         | 616.8 <sup>a</sup> ±3.2     | 23.8 <sup>a</sup> ±1.1      | 144.7 <sup>ij</sup> ±17.9    | 4,428 <sup>ijkl</sup> ±27.9     | 218.7 <sup>ab</sup> ±19.3     | 26.0 <sup>l</sup> ±2.3       | 7.7 <sup>a</sup> ±0.2       | 49.1 <sup>abcd</sup> ±.5     | 419.7 <sup>ghij</sup> ±30.2    | 9,070 <sup>hijkl</sup> ±1,262    |
| 6          | 126.0 <sup>bcde</sup> ±14.1 | 20.7 <sup>cdef</sup> ±1.7  | 210.9 <sup>hi</sup> ±25.7    | 10.5 <sup>bcd</sup> ±0.2      | 20.7 <sup>efg</sup> ±1.2  | 12.0 <sup>cdefg</sup> ±1.5 | 5.1 <sup>bcdef</sup> ±0.6 | 160.8 <sup>ghi</sup> ±9.5   | 2.0 <sup>bcd</sup> ±0.4     | 62.7 <sup>bcd</sup> ±5.2     | 2,663 <sup>cdefgh</sup> ±312    | 1,155 <sup>defg</sup> ±72     | 6.7 <sup>abcd</sup> ±1.4     | 48.0 <sup>cdef</sup> ±3.0   | 84.0 <sup>defg</sup> ±5.1    | 292.9 <sup>bcdef</sup> ±6.9    | 9,436 <sup>ijkl</sup> ±2,724     |
| 7          | 190.7 <sup>efgh</sup> ±25.1 | 24.1 <sup>defgh</sup> ±1.8 | 203.6 <sup>ghi</sup> ±16.5   | 10.2 <sup>bcd</sup> ±1.5      | 31.3 <sup>hijk</sup> ±3.7 | 28.7 <sup>mno</sup> ±3.1   | 5.0 <sup>bcdef</sup> ±1.9 | 183.3 <sup>ghi</sup> ±15.5  | 1.6 <sup>abcde</sup> ±0.2   | 88.0 <sup>cdef</sup> ±1.8    | 4,516 <sup>kl</sup> ±109        | 890.0 <sup>bcd</sup> ±69.2    | 12.7 <sup>defghij</sup> ±1.5 | 124.0 <sup>k</sup> ±10.6    | 129.9 <sup>ijk</sup> ±1.3    | 616.7 <sup>m</sup> ±34.9       | 10,457 <sup>kl</sup> ±1,071      |
| 8          | 145.3 <sup>defg</sup> ±14.9 | 26.1 <sup>efgh</sup> ±2.6  | 164.3 <sup>fghi</sup> ±32.8  | 12.5 <sup>fghij</sup> ±1.0    | 28.0 <sup>hij</sup> ±3.4  | 22.7 <sup>ijkl</sup> ±1.8  | <LOD <sup>a</sup>         | 229.4 <sup>ijkl</sup> ±1.6  | 2.0 <sup>bcd</sup> ±0.2     | 83.3 <sup>cdef</sup> ±7.7    | 3,622 <sup>fghijkl</sup> ±44    | 386.7 <sup>abc</sup> ±14.8    | 10.0 <sup>cdef</sup> ±0.7    | 90.7 <sup>ghij</sup> ±7.8   | 133.5 <sup>jk</sup> ±2.0     | 480.0 <sup>ijkl</sup> ±29.1    | 8,024 <sup>defghijk</sup> ±946   |
| 9          | 216.7 <sup>ijk</sup> ±5.7   | 30.1 <sup>ghij</sup> ±4.0  | 299.1 <sup>j</sup> ±32.8     | 15.1 <sup>jk</sup> ±2.1       | 35.3 <sup>jk</sup> ±2.2   | 27.3 <sup>klmn</sup> ±1.4  | <LOD <sup>a</sup>         | 250.0 <sup>kl</sup> ±9.8    | 2.7 <sup>defgh</sup> ±0.1   | 110.7 <sup>efghi</sup> ±12.1 | 5,004 <sup>klmn</sup> ±11       | 1,592 <sup>fg</sup> ±8        | 10.7 <sup>defgh</sup> ±1.0   | 104.0 <sup>hij</sup> ±13.1  | 204.0 <sup>l</sup> ±20.0     | 532.0 <sup>ijklm</sup> ±6.1    | 9,746 <sup>ijkl</sup> ±1,195     |
| 10         | 112.7 <sup>bc</sup> ±9.5    | 15.0 <sup>bc</sup> ±2.0    | 132.9 <sup>defgh</sup> ±15.6 | 11.7 <sup>defghij</sup> ±0.3  | 16.7 <sup>cde</sup> ±1.6  | 21.5 <sup>ijk</sup> ±3.0   | <LOD <sup>a</sup>         | 148.7 <sup>defg</sup> ±10.0 | 1.7 <sup>abcde</sup> ±0.1   | 91.3 <sup>cdef</sup> ±8.3    | 2,225 <sup>bcd</sup> ±133       | 1,292 <sup>efg</sup> ±35.8    | 14.7 <sup>fghij</sup> ±1.7   | 105.3 <sup>hij</sup> ±15.3  | 144.7 <sup>k</sup> ±5.8      | 534.0 <sup>ijklm</sup> ±3.4    | 5,809 <sup>defgh</sup> ±1,113    |
| 11         | 257.3 <sup>kl</sup> ±31.6   | 20.0 <sup>cdef</sup> ±3.9  | 109.6 <sup>cdef</sup> ±9.8   | 11.5 <sup>defghij</sup> ±2.0  | 28.2 <sup>hijk</sup> ±0.6 | 19.3 <sup>ghij</sup> ±1.5  | 6.6 <sup>defg</sup> ±1.8  | 171.3 <sup>fgh</sup> ±20.6  | 1.5 <sup>abcde</sup> ±0.2   | 68.0 <sup>bcd</sup> ±1.1     | 3,873 <sup>ghijkl</sup> ±415    | 224.3 <sup>ab</sup> ±86.1     | 10.7 <sup>cdefg</sup> ±1.3   | 110.7 <sup>ijk</sup> ±19.0  | 148.0 <sup>k</sup> ±11.5     | 617.3 <sup>m</sup> ±41.6       | 8,188 <sup>efghijkl</sup> ±1,466 |
| 12         | 155.3 <sup>efg</sup> ±20.0  | 15.0 <sup>bcd</sup> ±3.4   | 121.5 <sup>cdefg</sup> ±17.4 | 11.6 <sup>defghij</sup> ±1.0  | 26.0 <sup>fghi</sup> ±2.8 | 10.7 <sup>cde</sup> ±1.0   | 5.0 <sup>bcdef</sup> ±0.6 | 92.7 <sup>cde</sup> ±6.0    | 0.8 <sup>abc</sup> ±0.2     | 43.3 <sup>ab</sup> ±8.4      | 2,686 <sup>cdefghi</sup> ±314   | 108.4 <sup>a</sup> ±14.8      | 5.3 <sup>ab</sup> ±0.9       | 61.3 <sup>cdefg</sup> ±8.0  | 90.7 <sup>efghi</sup> ±5.5   | 404.0 <sup>fghi</sup> ±38.2    | 5,036 <sup>bcde</sup> ±254       |
| 13         | 150.7 <sup>cdef</sup> ±10.5 | 18.3 <sup>cde</sup> ±0.2   | 111.7 <sup>cdef</sup> ±61.5  | 6.8 <sup>abcde</sup> ±1.4     | 23.2 <sup>efgh</sup> ±3.0 | 9.9 <sup>cd</sup> ±1.2     | 2.6 <sup>b</sup> ±0.7     | 87.3 <sup>bc</sup> ±10.2    | 0.7 <sup>ab</sup> ±0.1      | 47.3 <sup>abc</sup> ±8.4     | 3,016 <sup>efghi</sup> ±52      | 133.2 <sup>a</sup> ±14.4      | 6.0 <sup>ab</sup> ±0.4       | 54.7 <sup>cdef</sup> ±10.2  | 86.2 <sup>efgh</sup> ±6.6    | 398.0 <sup>efghi</sup> ±20.0   | 4,793 <sup>bcde</sup> ±815       |
| 14         | 289.7 <sup>l</sup> ±5.8     | 13.2 <sup>bc</sup> ±1.0    | 404.5 <sup>k</sup> ±39.9     | 11.9 <sup>efghij</sup> ±0.6   | 13.3 <sup>bcd</sup> ±2.9  | 14.8 <sup>efghi</sup> ±1.9 | 3.4 <sup>bc</sup> ±0.5    | 119.2 <sup>cdef</sup> ±6.4  | 0.9 <sup>abc</sup> ±0.1     | 80.0 <sup>bcd</sup> ±8.0     | 2,669 <sup>cdefghi</sup> ±512.8 | 3,060 <sup>hi</sup> ±18.7     | 20.0 <sup>k</sup> ±2.6       | 107.9 <sup>jk</sup> ±15.9   | 216.4 <sup>l</sup> ±4.4      | 948.7 <sup>n</sup> ±83.6       | 8,046 <sup>defghijk</sup> ±1,015 |
| 15         | 160.5 <sup>def</sup> ±13.8  | 15.7 <sup>bcd</sup> ±1.1   | 135.1 <sup>defgh</sup> ±3.7  | 8.3 <sup>abcde</sup> ±0.9     | 21.7 <sup>efg</sup> ±1.5  | 11.3 <sup>cdef</sup> ±0.8  | 5.0 <sup>bcde</sup> ±0.2  | 106.8 <sup>cd</sup> ±6.4    | 0.6 <sup>a</sup> ±0.2       | 50.0 <sup>abc</sup> ±8.5     | 2,710 <sup>defgh</sup> ±2.6     | 265.2 <sup>ab</sup> ±40.1     | 5.8 <sup>abc</sup> ±0.4      | 59.1 <sup>defg</sup> ±4.4   | 92.1 <sup>ghij</sup> ±9.9    | 440.1 <sup>hijk</sup> ±22.3    | 5,329 <sup>cdefg</sup> ±809      |
| 16         | 211.8 <sup>hij</sup> ±7.5   | 8.1 <sup>a</sup> ±0.6      | 404.8 <sup>k</sup> ±15.2     | 5.9 <sup>abcd</sup> ±0.2      | 7.3 <sup>ab</sup> ±0.3    | 10.0 <sup>cde</sup> ±1.4   | 3.2 <sup>b</sup> ±0.7     | 84.9 <sup>bc</sup> ±6.7     | 0.8 <sup>abc</sup> ±0.2     | 58.7 <sup>bcd</sup> ±8.0     | 1,835 <sup>abcde</sup> ±238.8   | 2,679 <sup>h</sup> ±692       | 14.8 <sup>jk</sup> ±2.5      | 94.9 <sup>ij</sup> ±4.6     | 110.3 <sup>ghijk</sup> ±9.8  | 634.7 <sup>m</sup> ±28.7       | 6,090 <sup>defghi</sup> ±476     |
| 17         | 102.3 <sup>b</sup> ±2.7     | 4.0 <sup>a</sup> ±0.2      | 2,032 <sup>l</sup> ±93       | 4.7 <sup>ab</sup> ±0.1        | 4.3 <sup>a</sup> ±0.1     | 3.9 <sup>ab</sup> ±0.2     | <LOD <sup>a</sup>         | 21.4 <sup>a</sup> ±1.2      | 0.5 <sup>a</sup> ±0.1       | 14.7 <sup>a</sup> ±1.2       | 308.0 <sup>a</sup> ±14.8        | 2,730 <sup>h</sup> ±247.6     | 6.5 <sup>ab</sup> ±0.1       | 12.7 <sup>ab</sup> ±2.6     | 16.7 <sup>a</sup> ±2.1       | 196.0 <sup>b</sup> ±10.6       | 501.2 <sup>a</sup> ±83.8         |
| 18         | 54.8 <sup>a</sup> ±4.0      | 21.3 <sup>cdefg</sup> ±1.5 | 21.6 <sup>ab</sup> ±3.2      | 9.1 <sup>abcde</sup> ±0.3     | 46.6 <sup>l</sup> ±2.1    | 32.4 <sup>no</sup> ±0.7    | 4.3 <sup>bcde</sup> ±0.6  | 148.9 <sup>efg</sup> ±4.2   | 5.2 <sup>k</sup> ±0.5       | 89.3 <sup>cdef</sup> ±14.5   | 1,016.7 <sup>abcd</sup> ±88.2   | 104.1 <sup>a</sup> ±36.1      | 17.1 <sup>hij</sup> ±0.2     | 31.3 <sup>abcd</sup> ±8.2   | 47.3 <sup>abcd</sup> ±.7     | 285.3 <sup>bcde</sup> ±4.8     | 2,173 <sup>abc</sup> ±326.2      |
| 19         | 255.6 <sup>kl</sup> ±9.9    | 32.6 <sup>hij</sup> ±0.2   | 76.5 <sup>abcde</sup> ±2.7   | 23.7 <sup>lm</sup> ±0.5       | 39.5 <sup>kl</sup> ±0.6   | 21.9 <sup>jklmn</sup> ±0.8 | 6.1 <sup>cdefg</sup> ±1.0 | 178.8 <sup>ghi</sup> ±10.2  | 19.3 <sup>m</sup> ±1.2      | 92.0 <sup>cdef</sup> ±4.0    | 4,586 <sup>ijklm</sup> ±590     | 107.0 <sup>a</sup> ±12.6      | 8.3 <sup>bcde</sup> ±0.5     | 58.7 <sup>defg</sup> ±3.5   | 149.2 <sup>k</sup> ±6.1      | 371.3 <sup>cdefghi</sup> ±22.0 | 6,671 <sup>defghij</sup> ±724    |
| 20         | 38.2 <sup>a</sup> ±1.7      | 14.6 <sup>bc</sup> ±1.3    | 8.1 <sup>a</sup> ±0.6        | 3.4 <sup>a</sup> ±0.2         | 33.5 <sup>ijk</sup> ±1.4  | 27.8 <sup>lmn</sup> ±1.4   | 3.2 <sup>b</sup> ±0.2     | 93.5 <sup>bc</sup> ±3.1     | 3.6 <sup>hij</sup> ±0.2     | 71.3 <sup>bcd</sup> ±2.3     | 707.8 <sup>ab</sup> ±60.9       | 26.9 <sup>a</sup> ±4.2        | 13.1 <sup>efghij</sup> ±0.1  | 26.6 <sup>abc</sup> ±5.4    | 33.2 <sup>abc</sup> ±2.8     | 262.7 <sup>bc</sup> ±28.9      | 1,594 <sup>ab</sup> ±244         |
| 21         | 46.3 <sup>a</sup> ±1.7      | 17.6 <sup>cde</sup> ±1.4   | 9.7 <sup>a</sup> ±0.9        | 4.9 <sup>abc</sup> ±0.5       | 46.5 <sup>l</sup> ±0.5    | 39.3 <sup>p</sup> ±2.7     | 2.5 <sup>b</sup> ±0.3     | 119.4 <sup>cde</sup> ±3.1   | 4.3 <sup>jk</sup> ±0.1      | 93.3 <sup>cdefg</sup> ±1.0   | 911.5 <sup>abc</sup> ±81.0      | 33.3 <sup>a</sup> ±8.4        | 17.9 <sup>ijk</sup> ±1.3     | 33.1 <sup>abcd</sup> ±8.5   | 46.1 <sup>abcd</sup> ±.9     | 292.7 <sup>bcdef</sup> ±8.5    | 2,055 <sup>abc</sup> ±200        |
| 22         | 314.0 <sup>m</sup> ±28.1    | 37.4 <sup>ijk</sup> ±1.9   | 131.3 <sup>defgh</sup> ±3.1  | 19.5 <sup>kl</sup> ±0.2       | 55.5 <sup>m</sup> ±3.3    | 28.9 <sup>op</sup> ±0.9    | 8.5 <sup>a</sup> ±2.4     | 224.5 <sup>jk</sup> ±10.3   | 2.1 <sup>cdefg</sup> ±0.2   | 139.3 <sup>hij</sup> ±4.3    | 6,359 <sup>mn</sup> ±276        | 246.4 <sup>ab</sup> ±36.9     | 12.1 <sup>efghij</sup> ±1.5  | 86.7 <sup>ijk</sup> ±5.6    | 188.5 <sup>l</sup> ±10.6     | 572.0 <sup>lm</sup> ±10.6      | 6,736 <sup>defghij</sup> ±708    |
| 23         | 169.9 <sup>efgh</sup> ±4.4  | 21.3 <sup>cdefg</sup> ±1.2 | 43.8 <sup>abc</sup> ±0.7     | 12.7 <sup>ghij</sup> ±1.5     | 19.3 <sup>def</sup> ±0.9  | 10.1 <sup>cde</sup> ±0.6   | <LOD <sup>a</sup>         | 140.7 <sup>defg</sup> ±7.9  | 1.1 <sup>abcd</sup> ±0.1    | 84.0 <sup>bcd</sup> ±1.1     | 3,968 <sup>hijkl</sup> ±421     | 37.7 <sup>a</sup> ±6.2        | 3.5 <sup>a</sup> ±0.1        | 32.1 <sup>abcd</sup> ±0.8   | 69.3 <sup>cdef</sup> ±5.5    | 283.3 <sup>bcd</sup> ±28.7     | 4,509 <sup>bcd</sup> ±591        |
| 24         | 283.7 <sup>lm</sup> ±3.3    | 41.6 <sup>k</sup> ±2.4     | 62.1 <sup>abcd</sup> ±0.6    | 26.8 <sup>m</sup> ±1.1        | 24.6 <sup>efgh</sup> ±1.2 | 15.1 <sup>defgh</sup> ±1.9 | 6.9 <sup>efg</sup> ±0.8   | 278.2 <sup>lm</sup> ±3.9    | 2.6 <sup>efgh</sup> ±0.2    | 106.0 <sup>cdefg</sup> ±13.3 | 6,542 <sup>n</sup> ±185         | 39.3 <sup>a</sup> ±4.0        | 5.0 <sup>ab</sup> ±0.8       | 41.6 <sup>cde</sup> ±0.2    | 136.5 <sup>jk</sup> ±6.1     | 312.7 <sup>cdefg</sup> ±9.9    | 5,886 <sup>defghi</sup> ±789     |
| 25         | 117.7 <sup>bcd</sup> ±10.1  | 21.0 <sup>cdef</sup> ±1.2  | 126.2 <sup>cdefg</sup> ±6.7  | 7.9 <sup>abcde</sup> ±0.6     | 6.9 <sup>ab</sup> ±0.2    | 11.9 <sup>cdefg</sup> ±0.8 | <LOD <sup>a</sup>         | 139.8 <sup>cdefg</sup> ±5.1 | 1.1 <sup>abcd</sup> ±0.1    | 133.3 <sup>ghij</sup> ±22.9  | 2,164 <sup>bcd</sup> ±93        | 1,088 <sup>cdefg</sup> ±146   | 14.3 <sup>ij</sup> ±0.3      | 74.1 <sup>fghi</sup> ±1.4   | 141.9 <sup>ijk</sup> ±5.4    | 553.3 <sup>klm</sup> ±52.6     | 8,500 <sup>fghijkl</sup> ±178    |

|           |                                 |                              |                                 |                                  |                              |                               |                             |                               |                                |                                 |                                   |                                  |                                |                               |                                 |                                   |                                      |
|-----------|---------------------------------|------------------------------|---------------------------------|----------------------------------|------------------------------|-------------------------------|-----------------------------|-------------------------------|--------------------------------|---------------------------------|-----------------------------------|----------------------------------|--------------------------------|-------------------------------|---------------------------------|-----------------------------------|--------------------------------------|
| <b>26</b> | 134.4 <sup>bcd</sup> ±<br>3.1   | 31.3 <sup>hij</sup> ±1<br>.8 | 124.3 <sup>cdefg</sup> ±<br>7.9 | 6.7 <sup>abcd</sup> ±1.5         | 10.9 <sup>abc</sup> ±<br>0.3 | 13.5 <sup>cdefg</sup><br>±0.5 | 3.6 <sup>bc</sup> ±0.<br>2  | 177.1 <sup>ghi</sup> ±<br>0.3 | 1.7 <sup>abcdefg</sup><br>±0.1 | 164.0 <sup>l</sup> ±10.<br>6    | 2,860 <sup>efghij</sup> ±<br>502  | 540.7 <sup>abcde</sup> ±<br>33.1 | 14.0 <sup>fghij</sup> ±<br>0.7 | 60.9 <sup>defg</sup> ±<br>3.9 | 138.9 <sup>jk</sup> ±9.<br>6    | 430.7 <sup>hij</sup> ±22.<br>5    | 7.370 <sup>defghijk</sup> ±<br>1,063 |
| <b>27</b> | 157.5 <sup>defg</sup> ±<br>5.6  | 15.9 <sup>bcd</sup> ±<br>0.8 | 137.6 <sup>defgh</sup> ±<br>1.7 | 8.4 <sup>abcdefgh</sup> ±<br>1.3 | 11.6 <sup>abcd</sup><br>±0.6 | 15.3 <sup>defgh</sup><br>±1.3 | 4.2 <sup>bcd</sup> ±<br>0.5 | 159.6 <sup>fgh</sup> ±<br>8.3 | 2.9 <sup>fghi</sup> ±0.<br>3   | 113.3 <sup>fghi</sup> ±<br>5.9  | 2,219 <sup>bcdefgh</sup><br>± 417 | 486.0 <sup>abcd</sup> ±3<br>8.2  | 14.8 <sup>ghij</sup> ±<br>1.6  | 92.6 <sup>hij</sup> ±7.<br>5  | 125.2 <sup>ijk</sup> ±4<br>.5   | 572.7 <sup>lm</sup> ±44.<br>3     | 9,071 <sup>hijkl</sup> ±64<br>2      |
| <b>28</b> | 186.5 <sup>fghi</sup> ±<br>14.7 | 38.7 <sup>jk</sup> ±3.<br>8  | 76.9 <sup>abcde</sup> ±5<br>.2  | 8.0 <sup>abcdefgh</sup> ±<br>1.4 | 11.6 <sup>abcd</sup><br>±0.4 | 10.7 <sup>cde</sup> ±<br>1.6  | <LOD <sup>a</sup>           | 206.3 <sup>ij</sup> ±9.<br>7  | 4.1 <sup>ijk</sup> ±0.<br>1    | 216.3 <sup>k</sup> ±17<br>.4    | 3,494 <sup>fghijk</sup> ±<br>361  | 228.7 <sup>ab</sup> ±47.<br>3    | 25.1 <sup>l</sup> ±4.<br>3     | 81.5 <sup>ghij</sup> ±<br>7.2 | 105.6 <sup>fghij</sup> ±<br>7.4 | 545.3 <sup>klm</sup> ±26<br>.4    | 8,936 <sup>hijkl</sup> ±62<br>7      |
| <b>29</b> | 44.3 <sup>a</sup> ±7.0<br>1     | 87.5 <sup>m</sup> ±5.<br>8   | 58.9 <sup>abcd</sup> ±1.<br>8   | 7.4 <sup>abcdefg</sup> ±<br>1.3  | 32.9 <sup>ijk</sup> ±<br>0.8 | 17.1 <sup>fghi</sup> ±<br>0.6 | <LOD <sup>a</sup>           | 347.3 <sup>a</sup> ±2<br>7.8  | 13.3 <sup>l</sup> ±0.<br>7     | 280.0 <sup>l</sup> ±29.<br>3    | 2,812 <sup>defghij</sup> ±<br>224 | 132.0 <sup>a</sup> ±4.0<br>7     | 39.4 <sup>m</sup> ±0.<br>7     | 50.0 <sup>cdef</sup> ±<br>3.6 | 65.0 <sup>bcd</sup> ±2<br>.9    | 384.7 <sup>defghi</sup> ±<br>13.6 | 5,301 <sup>cdef</sup> ±1,1<br>52     |
| <b>30</b> | 111.7 <sup>bc</sup> ±1<br>4.8   | 42.3 <sup>k</sup> ±3.<br>9   | 167.1 <sup>fghi</sup> ±<br>2.4  | 13.7 <sup>hij</sup> ±1.2         | 33.9 <sup>ijk</sup> ±<br>1.6 | 22.1 <sup>ijkl</sup> ±<br>0.6 | 4.7 <sup>bcd</sup> ±<br>0.5 | 295.6 <sup>m</sup> ±1<br>0.5  | 3.0 <sup>ghij</sup> ±0.<br>2   | 117.0 <sup>fghi</sup> ±<br>14.7 | 6,448 <sup>n</sup> ±<br>1,825     | 189.3 <sup>ab</sup> ±24.<br>2    | 11.4 <sup>defghi</sup><br>±0.4 | 73.8 <sup>fghi</sup> ±<br>4.7 | 125.9 <sup>ijk</sup> ±2<br>2.2  | 470.0 <sup>ijkl</sup> ±15<br>.1   | 11,692 <sup>l</sup> ±1,4<br>43       |

<sup>a-o</sup> – values within columns followed by the same letter are not significantly different according for  $\alpha = 0.01$
